# Supplementary material for: Alternative Splice in Alternative Lice
Source: PubMed Central journal article supplement (PMC4576711; doi:10.1093/molbev/msv151), 2015-07-13
Supplement: supp_msv151_Tovar_et_al_supplementary_information.pdf [file supp_msv151_Tovar_et_al_supplementary_information.pdf]

## SUPPLEMENTARY INFORMATION

Supplementary Table 1. Alternative splicing (AS) prevalence in head and body lice as compared to other invertebrate species. Human and mouse are included for reference.

| Subgroup   | Scientific name                   | Estimated AS prevalence using comparative index AS |
|------------|-----------------------------------|----------------------------------------------------|
| Insects    | <i>Pediculus humanus capitis</i>  | 0.2974                                             |
| Insects    | <i>Pediculus humanus corporis</i> | 0.3089                                             |
| Insects    | <i>Drosophila melanogaster</i>    | 0.4166                                             |
| Crustacea  | <i>Daphnia pulex</i>              | 0.2312                                             |
| Arachnida  | <i>Ixodes scapularis</i>          | 0.2683                                             |
| Roundworms | <i>Caenorhabditis elegans</i>     | 0.2785                                             |
| Mammals    | <i>Homo sapiens</i>               | 0.8909                                             |
| Mammals    | <i>Mus musculus</i>               | 0.842                                              |

Supplementary Table 2. Image sources

| <b>Species name</b>               | <b>Source</b>                                                                                                                                                                                                                                                                                                                     |
|-----------------------------------|-----------------------------------------------------------------------------------------------------------------------------------------------------------------------------------------------------------------------------------------------------------------------------------------------------------------------------------|
| <i>Pediculus humanus capitis</i>  | Gilles San Martin, "Male human head louse" August 17, 2010 via Flickr, Creative Commons Attribution-Share Alike<br><a href="http://commons.wikimedia.org/wiki/File:Male_human_head_ouse.jpg">http://commons.wikimedia.org/wiki/File:Male_human_head_ouse.jpg</a>                                                                  |
| <i>Pediculus humanus corporis</i> | CDC/ Frank Collins, Ph.D., "Pediculus humanus var. corporis" 2006 via Public Health Image Library, public domain<br><a href="http://phil.cdc.gov/phil/details.asp?pid=9206">http://phil.cdc.gov/phil/details.asp?pid=9206</a>                                                                                                     |
| <i>Drosophila melanogaster</i>    | André Karwath, "Drosophila melanogaster - side" July 16, 2005 via Wikipedia Commons, Creative Commons Attribution-Share Alike<br><a href="http://commons.wikimedia.org/wiki/File:Drosophila_melanogaster_-_side_(aka).jpg">http://commons.wikimedia.org/wiki/File:Drosophila_melanogaster_-_side_(aka).jpg</a>                    |
| <i>Daphnia pulex</i>              | Paul Hebert, "Daphnia pulex" June 14, 2005 via Wikipedia Commons, Creative Commons Attribution<br><a href="http://commons.wikimedia.org/wiki/File:Daphnia_pulex.png">http://commons.wikimedia.org/wiki/File:Daphnia_pulex.png</a>                                                                                                 |
| <i>Ixodes scapularis</i>          | Scott Bauer, "Adult deer tick, Ixodes scapularis", public domain<br><a href="http://commons.wikimedia.org/wiki/File:Adult_deer_tick.jpg">http://commons.wikimedia.org/wiki/File:Adult_deer_tick.jpg</a>                                                                                                                           |
| <i>Caenorhabditis elegans</i>     | Bob Goldstein, "Caenorhabditis elegans, adult hermaphrodite" 2007 via Wikipedia commons, Creative Commons Attribution-Share Alike<br><a href="http://commons.wikimedia.org/wiki/File:CelegansGoldsteinLabUNC.jpg">http://commons.wikimedia.org/wiki/File:CelegansGoldsteinLabUNC.jpg</a>                                          |
| <i>Aedes aegypti</i>              | James Gathany, "The yellow fever mosquito Aedes aegypti, taking a bloodmeal." 2005 via Public Health Image Library, public domain<br><a href="http://commons.wikimedia.org/wiki/File:Aedes_aegypti_bloodfeeding_CDC_Gathany.jpg">http://commons.wikimedia.org/wiki/File:Aedes_aegypti_bloodfeeding_CDC_Gathany.jpg</a>            |
| <i>Acyrtosiphon pisum</i>         | Shipper Wu, "Pea aphids extracting sap from the stem and leaves of garden peas." February 2010 via Wikipedia commons, Creative Commons Attribution<br><a href="http://commons.wikimedia.org/wiki/File:Acyrtosiphon_pisum_(pea_aphid)-PLoS.jpg">http://commons.wikimedia.org/wiki/File:Acyrtosiphon_pisum_(pea_aphid)-PLoS.jpg</a> |

Supplementary Table 3. Enrichment and impoverishment of alternative splicing (AS) event types among genes with head louse specific AS events.

| AS event type | Head louse specific AS events per type | Expected number of head louse specific AS events from 10000 random samples | Standard Error | Z-score | One sided p value | Bonferroni adjusted p-value |
|---------------|----------------------------------------|----------------------------------------------------------------------------|----------------|---------|-------------------|-----------------------------|
| ES            | 398                                    | 350.3187                                                                   | 14.71017       | 3.2413  | 0.000594754       | 0.002973767                 |
| 5S            | 303                                    | 368.1552                                                                   | 14.95069       | -4.3580 | 6.56E-06          | 3.28E-05                    |
| 3S            | 329                                    | 208.6949                                                                   | 12.24355       | 9.8259  | 4.35E-23          | 2.18E-22                    |
| I             | 238                                    | 316.8503                                                                   | 14.1002        | -5.5921 | 1.12E-08          | 5.61E-08                    |
| 3S5S          | 147                                    | 170.9809                                                                   | 11.10434       | -2.1595 | 0.0154019         | 0.07700952                  |

Supplementary Table 4. Enrichment and impoverishment of alternative splicing (AS) event types among genes with body louse specific AS events.

| AS event type | Body louse specific AS events per type | Expected number of body louse specific AS events from 10000 random samples | Standard Error | Z-score   | One sided p value | Bonferroni adjusted p-value |
|---------------|----------------------------------------|----------------------------------------------------------------------------|----------------|-----------|-------------------|-----------------------------|
| ES            | 742                                    | 540.3015                                                                   | 17.44294       | 11.56333  | 3.16E-31          | 1.58E-30                    |
| 5S            | 488                                    | 568.337                                                                    | 17.55804       | -4.57551  | 2.38E-06          | 1.19E-05                    |
| 3S            | 420                                    | 321.8113                                                                   | 14.09827       | 6.964593  | 1.65E-12          | 8.23E-12                    |
| I             | 313                                    | 489.227                                                                    | 16.78252       | -10.50063 | 4.29E-26          | 2.15E-25                    |
| 3S5S          | 220                                    | 263.3232                                                                   | 13.05875       | -3.317561 | 0.000454036       | 0.00227018                  |

Supplementary Table 5. GO term categories enriched and impoverished among genes with body louse specific alternative splicing events. No terms were enriched or underrepresented in head lice.

| Enriched GO ID    | GO Term                                    | Genes with body lice specific AS events in GO Term | Expected no. of genes | Standard Error | Z-score  | BH adjusted p-value |
|-------------------|--------------------------------------------|----------------------------------------------------|-----------------------|----------------|----------|---------------------|
| GO:0007422        | peripheral nervous system development      | 30                                                 | 17.2124               | 3.2522         | 3.9319   | 0.0022              |
| GO:0007435        | salivary gland morphogenesis               | 26                                                 | 15.2889               | 3.0898         | 3.4665   | 0.0069              |
| GO:0007424        | open tracheal system development           | 40                                                 | 27.6003               | 4.0973         | 3.0262   | 0.0164              |
| GO:0007391        | dorsal closure                             | 39                                                 | 27.5647               | 4.1133         | 2.7800   | 0.0280              |
| GO:0006355        | regulation of transcription; DNA-dependent | 50                                                 | 37.1758               | 4.6985         | 2.7293   | 0.0280              |
| GO:0030707        | ovarian follicle cell development          | 25                                                 | 16.807                | 3.2408         | 2.5280   | 0.0395              |
| GO:0048102        | autophagic cell death                      | 24                                                 | 16.0587               | 3.1591         | 2.5137   | 0.0395              |
| Impoverished GOID |                                            |                                                    |                       |                |          |                     |
| GO:0055114        | oxidation-reduction process                | 26                                                 | 41.73                 | 5.0595         | -3.10898 | 0.0164              |
| GO:0006412        | translation                                | 12                                                 | 20.8038               | 3.5644         | -2.46986 | 0.0397              |
